# Supplementary material for: Transduction Pattern of AAVs in the Trabecular Meshwork and Anterior-Segment Structures in a Rat Model of Ocular Hypertension
Source: PubMed Central journal article supplement — Mol Ther Methods Clin Dev. 2019 Jul 10;14:197–205. doi: 10.1016/j.omtm.2019.06.009 (PMC6685643; doi:10.1016/j.omtm.2019.06.009), 2019-07-10
Supplement: mmc1.pdf [file mmc1.pdf]

**OMTM, Volume 14**

**Supplemental Information**

**Transduction Pattern of AAVs in the Trabecular  
Meshwork and Anterior-Segment Structures  
in a Rat Model of Ocular Hypertension**

**Si Hyung Lee, Kyeong Sun Sim, Chan Yun Kim, and Tae Kwann Park**

Supplemental Figures

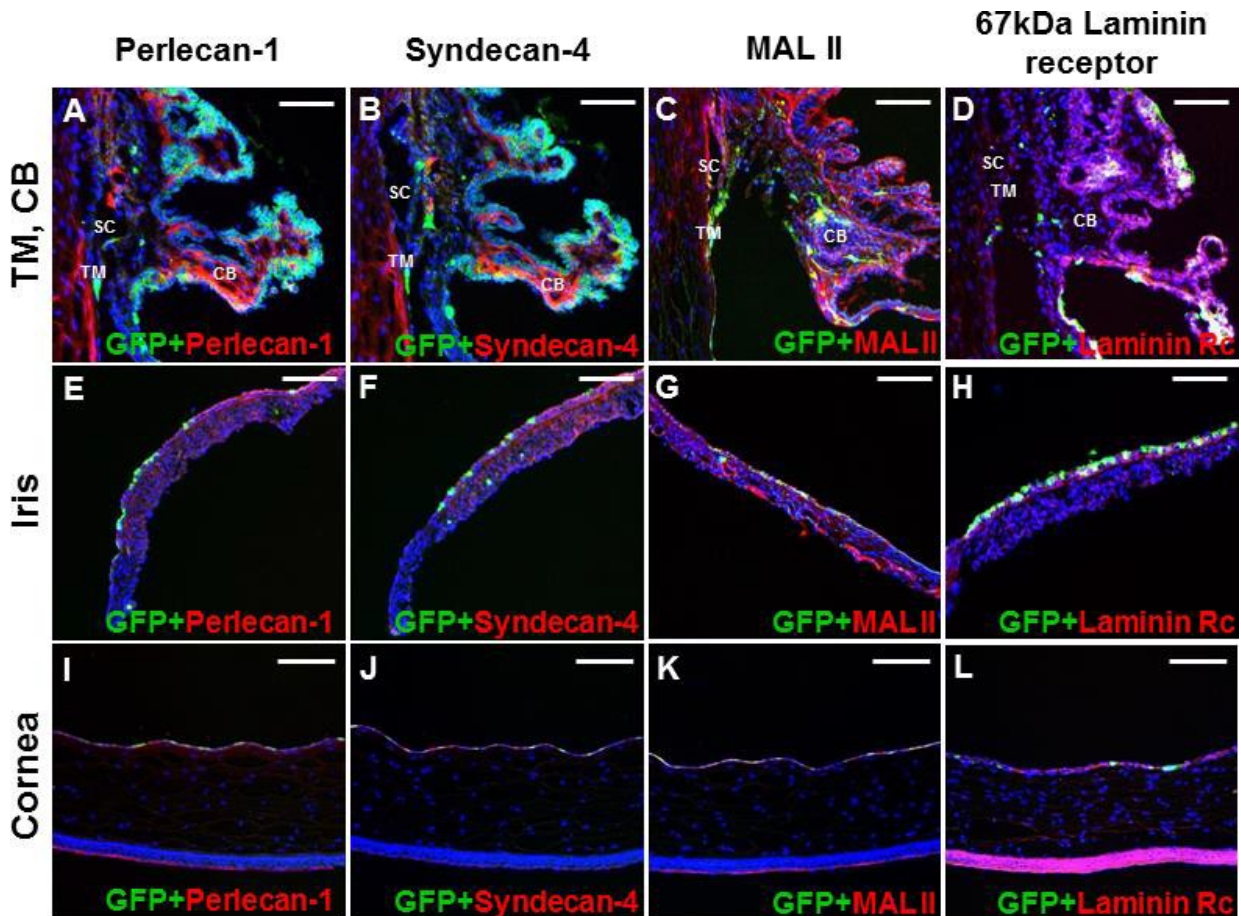

Figure S1. Cross-sectional images of the anterior segment of OHT and control eyes immunostained for GFP (green) and perlecan-1, syndecan-4, MAL II, and 67kDa laminin receptor (red) at 1 months after circumlimbal suture.

Transverse sectional images of anterior segment revealed co-localization of EGFP and receptors for AAV2 (perlecan-1 and syndecan-4), AAV5 (MAL II), and AAV8 (67kDa laminin receptor) in several portion of TM and ciliary body (A-D), iris (E-H), and corneal endothelium (I-L). Images are representatives of 45 mice analyzed (30 for OHT group and 15 for control). Scale bar, 20  $\mu$ m.

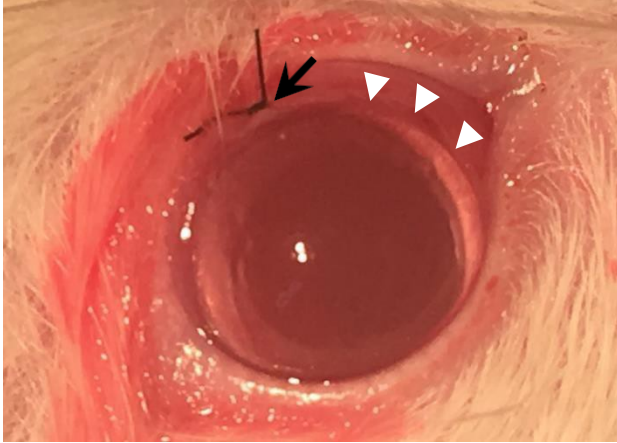

**Figure S2. Circumlimbal suture to produce a rat model of OHT.**

To produce an OHT rat model, circumlimbal suturing was performed to elevate IOP in one eye. Circumferential suturing around the globe at approximately 1.0–1.5 mm behind the limbus was performed using 7/0 nylon compress and pressurize the eyeball.

**Supplemental Tables****Table S1. Primary antibodies used in this study**

| <b>Target</b>             | <b>Host</b> | <b>Manufacturer</b>                              | <b>Catalog No.</b> | <b>Dilution</b> |
|---------------------------|-------------|--------------------------------------------------|--------------------|-----------------|
| GS                        | Mouse       | Millipore, Billerica, MA, USA                    | MAB302             | 1:500           |
| CD31                      | Rat         | BD Transduction Laboratories, Lexington, KY, USA | 550274             | 1:100           |
| iba-1                     | Rabbit      | Wako Chemicals, Osaka, Japan                     | 019-19741          | 1:1000          |
| NeuN                      | Mouse       | Millipore, Billerica, MA, USA                    | MAB377             | 1:2000          |
| PKC $\alpha$              | Mouse       | Santa Cruz Biotechnology, Dallas, TX, USA        | SC-8393            | 1:1000          |
| Calbindin                 | Mouse       | Sigma-Aldrich, St. Louis, MO, USA                | C9848              | 1:100           |
| Calretinin                | Rabbit      | Sigma-Aldrich, St. Louis, MO, USA                | C7479              | 1:400           |
| Perlecan                  | Rat         | Invitrogen, Carlsbad, CA, USA                    | MA5-14641          |                 |
| Syndecan-4                | Rabbit      | Abcam, Cambridge, UK                             | ab24511            | 1:500           |
| 37/67kDa laminin receptor | Rabbit      | Abcam Cambridge, UK                              | ab137388           | 1:100           |

**Table S2. Primers used in this study**

| Gene                      | Primer sequence               |                                |
|---------------------------|-------------------------------|--------------------------------|
|                           | Forward                       | Reverse                        |
| Glypican-1                | 5'TGGCGCCTACGGTGGAAATGATGT-3' | 5'-GAGTGGCGGCCGAGGTCTTCTGTC-3' |
| Syndecan-4                | 5'-GAACCATGGCGCCTGTCTGC-3'    | 5'-CCTGGGCTCCTCCGTGTCATCT-3'   |
| Perlecan-1                | 5'-AGGTCCTTTCCCGCCCA-3'       | 5'-CAACTTGACAGGGATGGCGA-3'     |
| 37/67kDa laminin receptor | 5'-AGCGAGCTGTGCTGAAGTTT-3'    | 5'-GTCACCACTAGAAGCCGTGG-3'     |
| GAPDH                     | 5'-ACGGCAAATTCAACGGCA-3'      | 5'-GGTCATGAGCCCTTCCAC-3'       |
